# Supplementary material for: Outstanding Enrofloxacin Removal Using an Unmodified Low-Cost Sorbent Prepared from the Leaves of Pyracantha koidzumii
Source: MDPI journal article supplement (doi:10.3390/antibiotics11111563), 2022-11-06
Supplement: s1 [file s1]

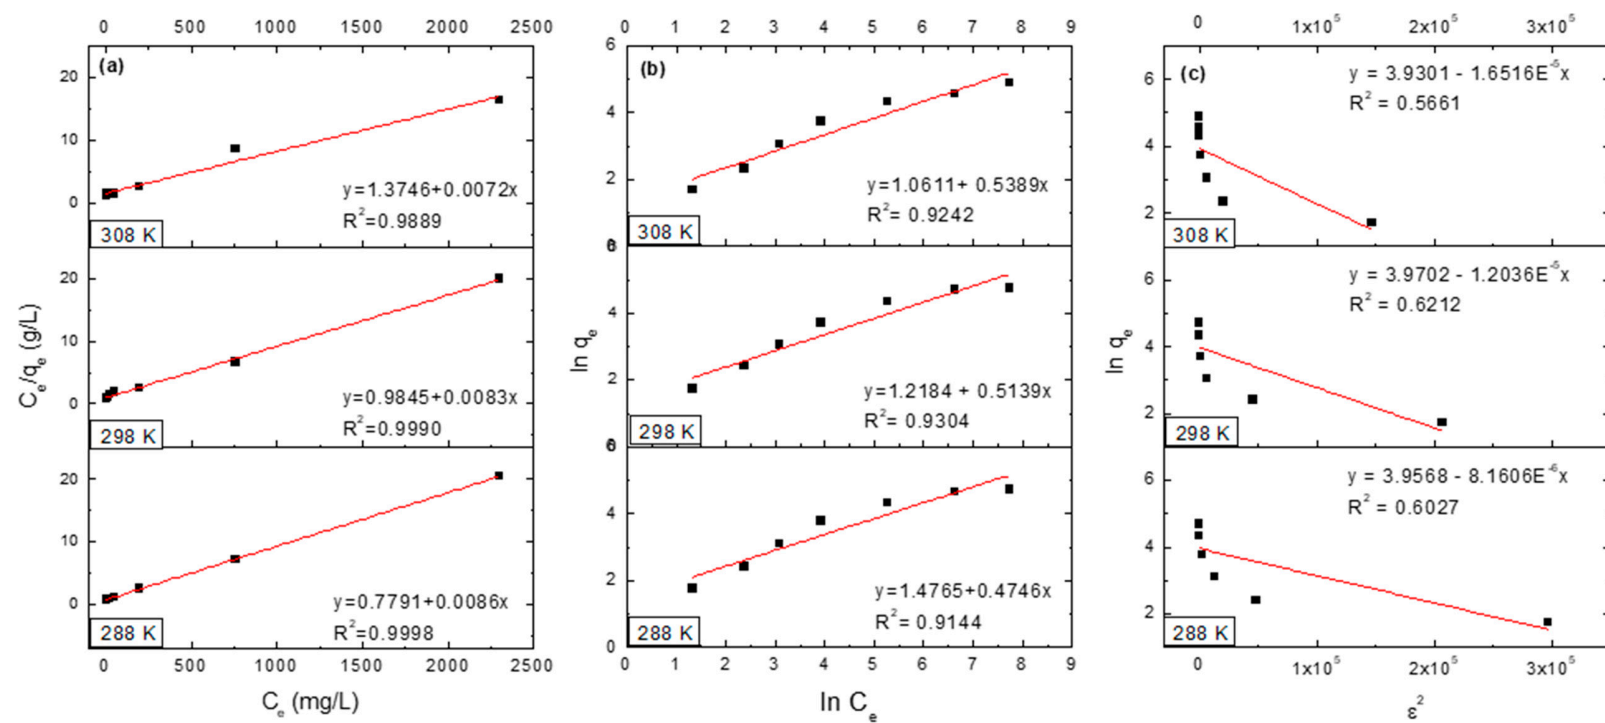

**Figure S2.** Enrofloxacin adsorption isotherms at a temperature of 288, 298, and 308 K. (a) Langmuir, (b) Freundlich, and (c) Dubinin–Radushkevich models.
