# Supplementary figures and images for: Outstanding Enrofloxacin Removal Using an Unmodified Low-Cost Sorbent Prepared from the Leaves of Pyracantha koidzumii
Source: MDPI journal article supplement (doi:10.3390/antibiotics11111563), 2022-11-06

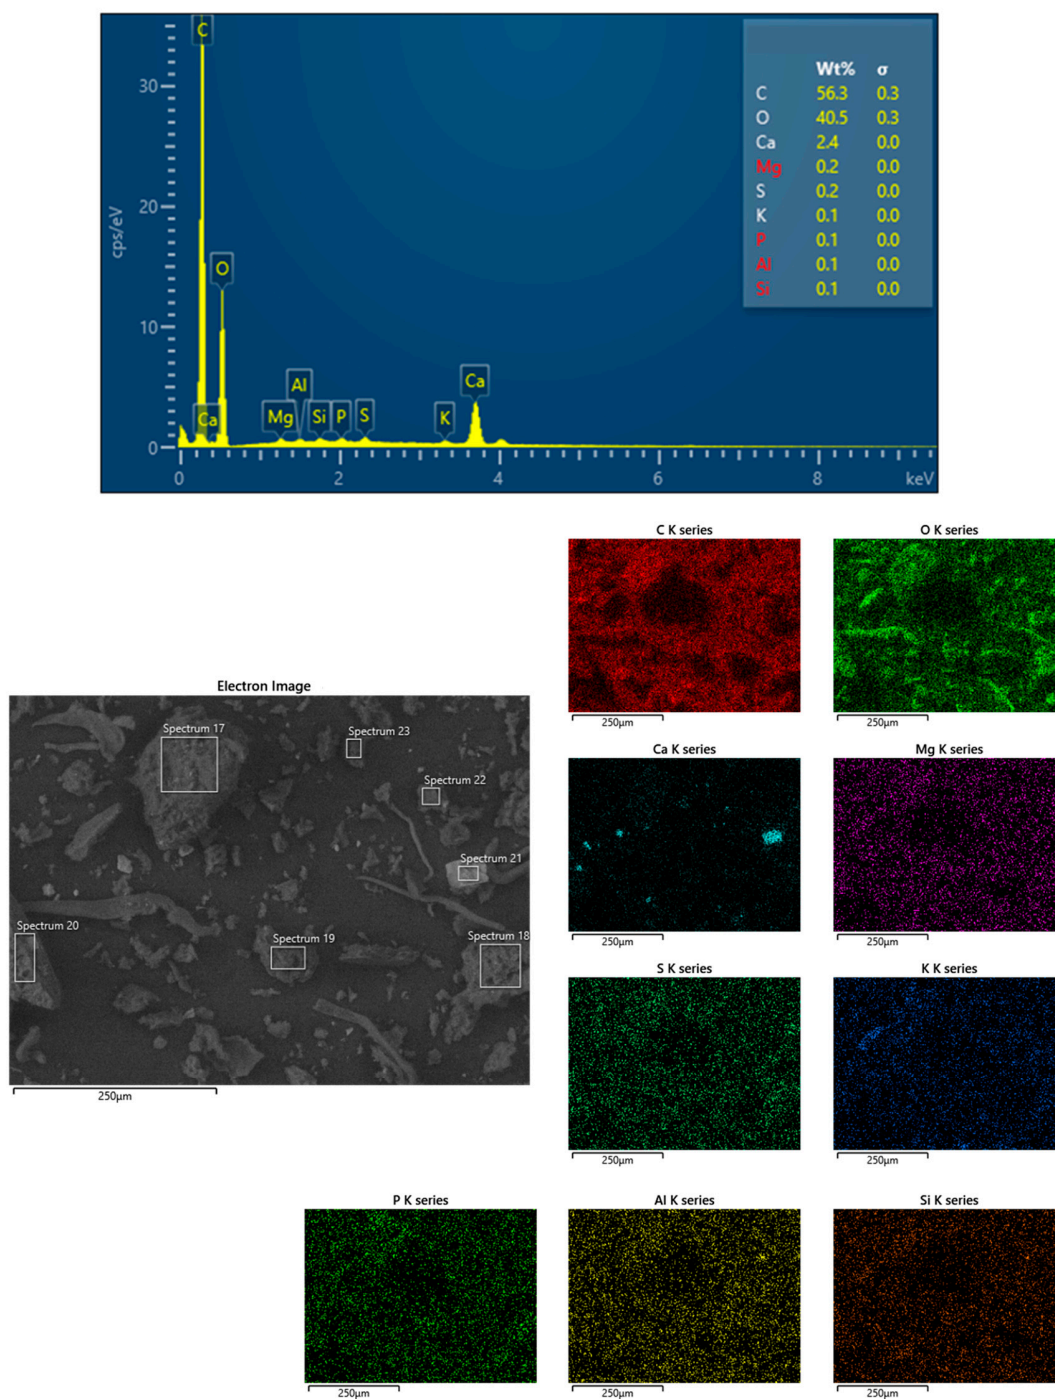

**Figure S1.** EDS spectrum and EDS mapping of the *P. koidzumii* sorbent.

Supplement: s1 [file s1]
